# Supplementary material for: Regulation of Epigenetic Modifications in the Placenta during Preeclampsia: PPARγ Influences H3K4me3 and H3K9ac in Extravillous Trophoblast Cells
Source: MDPI journal article supplement (doi:10.3390/ijms222212469), 2021-11-18
Supplement: s1 [file s1]

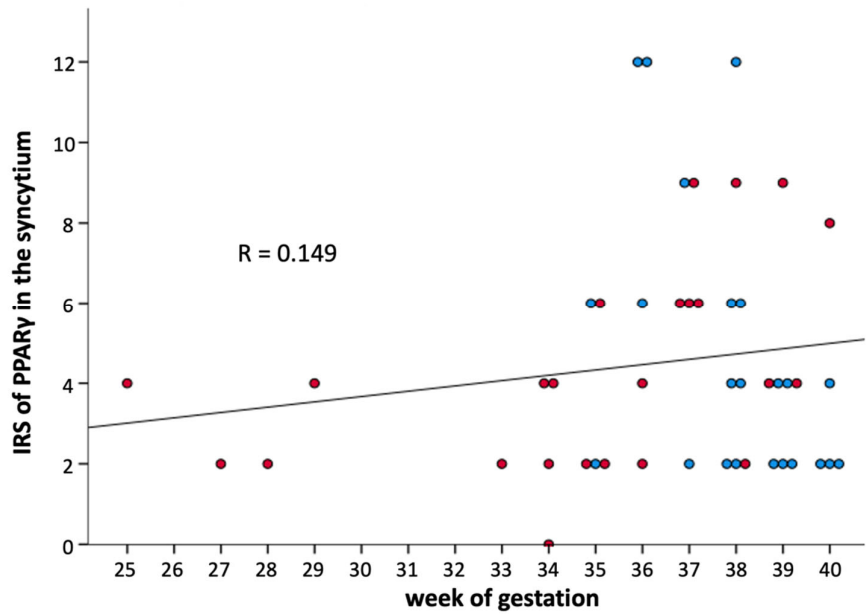

**Figure S1.** Visualization of histone expression in relation to the weeks of gestation. The regression line represents no significant correlation ( $p = 0.316$ ). Linear regression was used to analyze the effect of the week of gestation on the IRS of PPAR $\gamma$  in the syncytium.

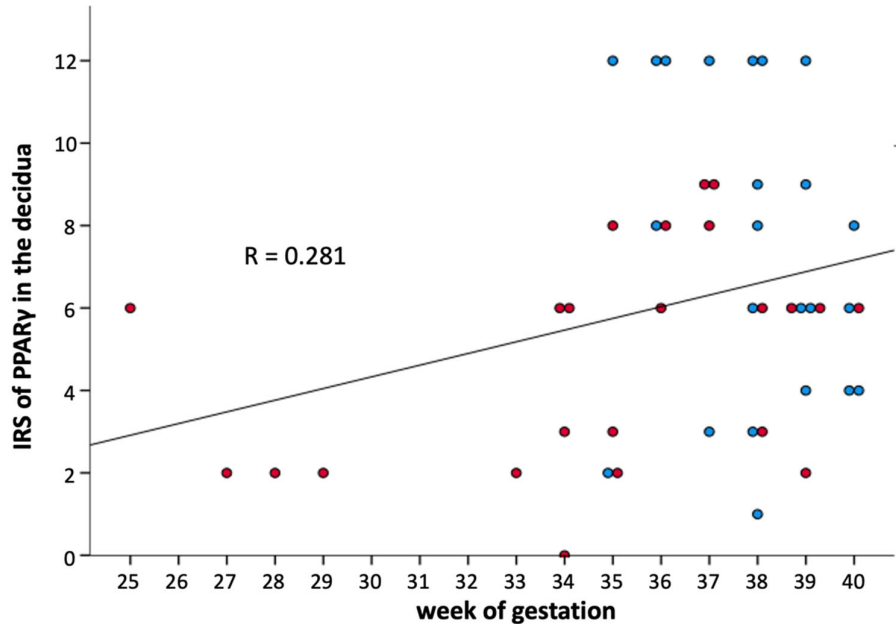

**Figure S2.** Visualization of histone expression in relation to the weeks of gestation. The regression line represents no significant correlation ( $p = 0.058$ ). Linear regression was used to analyze the effect of the week of gestation on the IRS of PPAR $\gamma$  in the decidua.

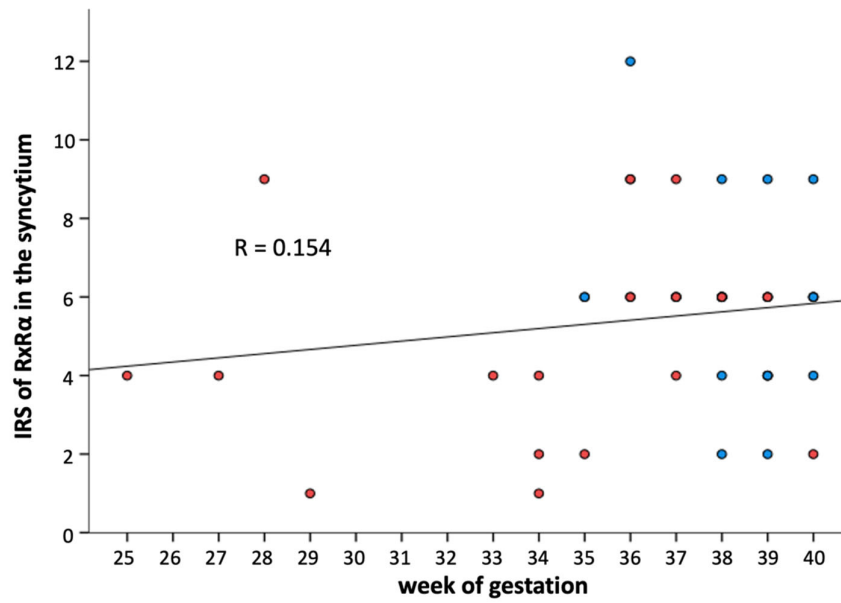

**Figure S3.** Visualization of histone expression in relation to the weeks of gestation. The regression line represents no significant correlation ( $p = 0.326$ ). Linear regression was used to analyze the effect of the week of gestation on the IRS of RxRα in the syncytium.

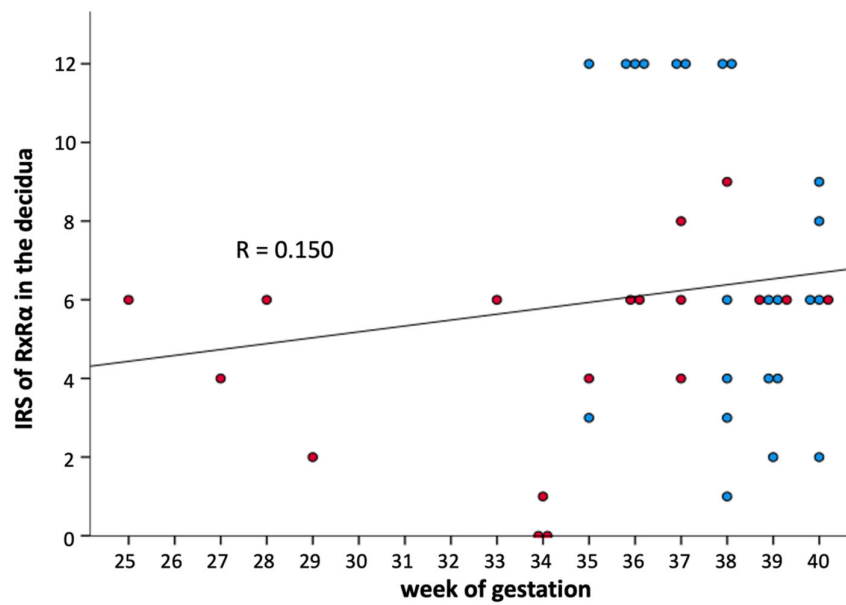

**Figure S4.** Visualization of histone expression in relation to the weeks of gestation. The regression line represents no significant correlation ( $p = 0.350$ ). Linear regression was used to analyze the effect of the week of gestation on the IRS of RxRα in the decidua.

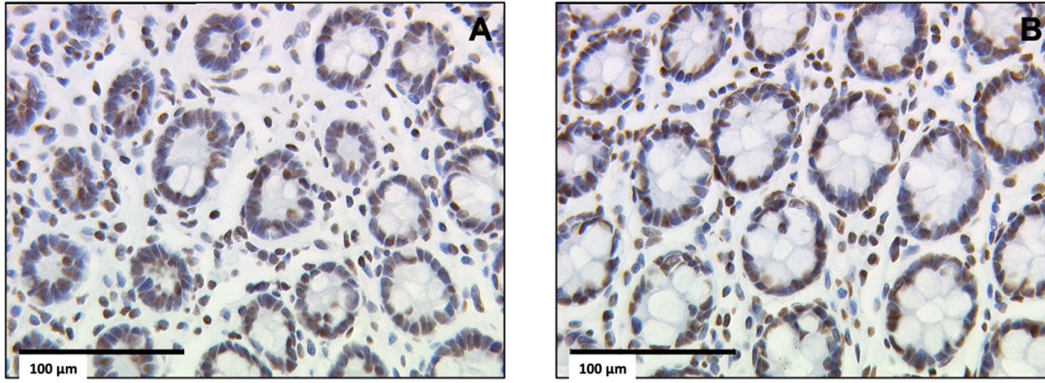

**Figure S5.** Positive control for PPAR $\gamma$  and RxR $\alpha$ . Representative immunohistochemistry images of positive control stainings. (A) expression of PPAR $\gamma$  in human colon tissue, scale bar: 100  $\mu$ m. (B) expression of RxR $\alpha$  in human colon tissue, scale bar: 100  $\mu$ m.

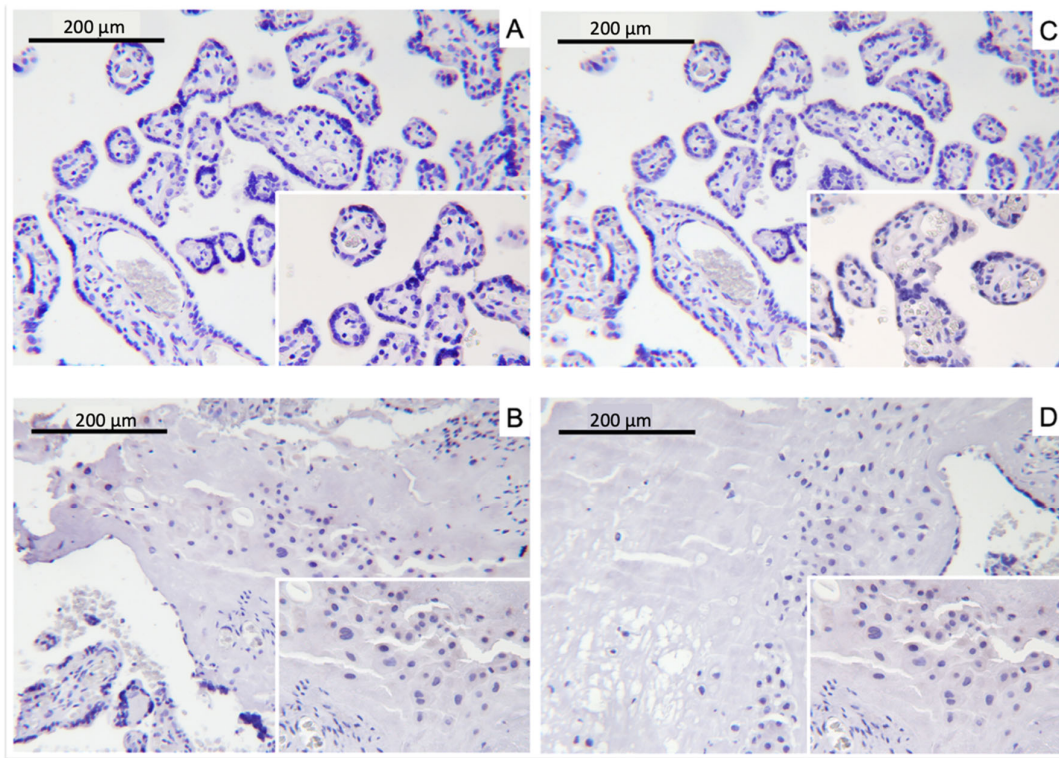

**Figure S6.** Negative control for PPAR $\gamma$  (A, B) and RxR $\alpha$  (C, D). Representative immunohistochemistry images of negative control stainings of placental tissue. (A, C) villous trophoblast; (B, D) decidua. scale bar: 200  $\mu$ m.

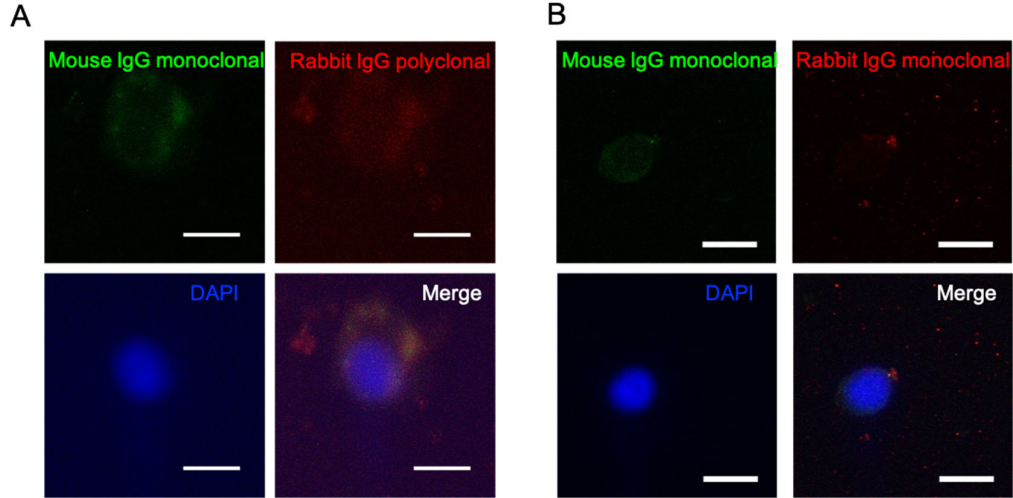

**Figure S7.** IF double staining: Negative controls for PPAR $\gamma$ , H3K9ac and H3K4me3, representative pictures. Respective Isotype IgG for PPAR $\gamma$  in green and for H3K9me3 in red (A), respective Isotype IgG for PPAR  $\gamma$  and H3K9ac in red (B). Scale bar 10  $\mu$ m.

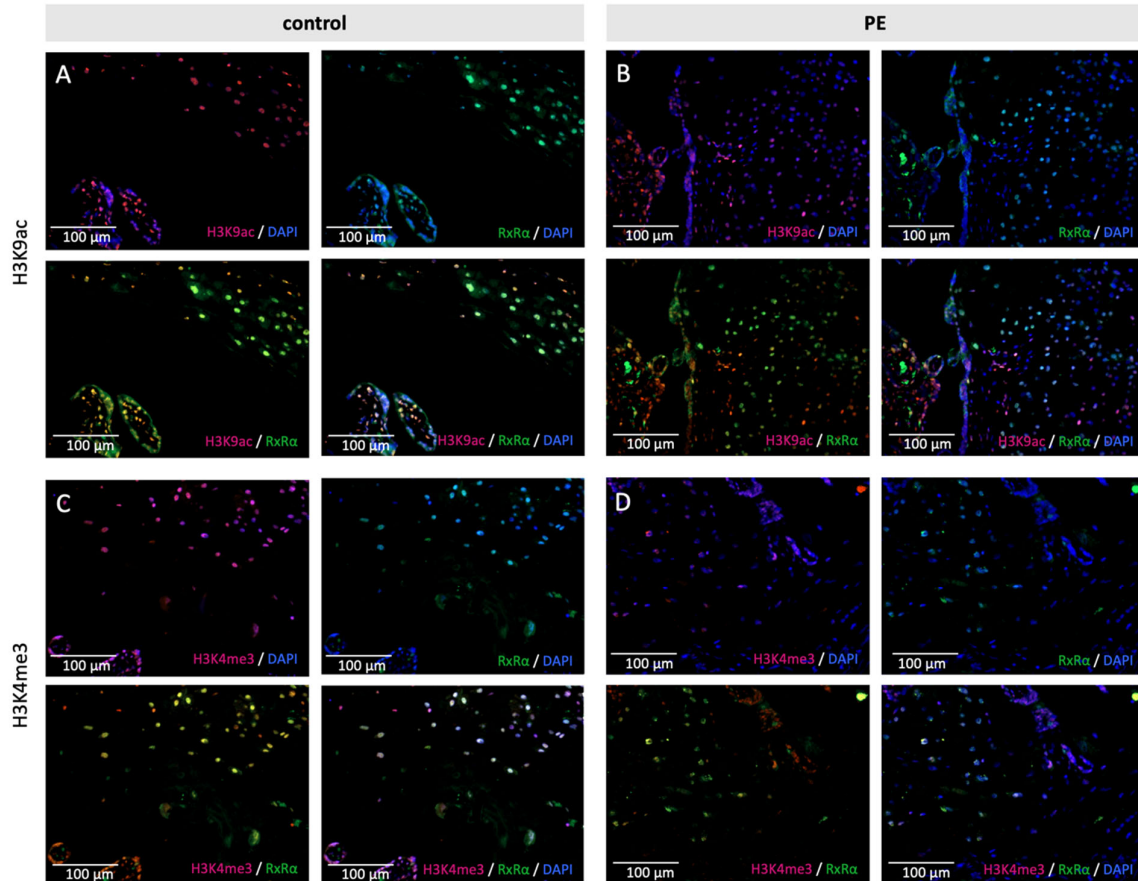

**Figure S8.** Examples of staining results of the immunofluorescence of RxR $\alpha$  and H3K9ac (A, B) and H3K4me3 (C, D), in control and PE placentas. Single immunofluorescence staining of H3K9ac and H3K4me3 (pink). Single immunofluorescence staining of RxR $\alpha$  (green). Double immunofluorescence staining of H3K9ac (A, B) and H3K4me3 (C, D) (red) and RxR $\alpha$  (green). DAPI as nucleus staining (blue). Scale bar 100  $\mu$ m.

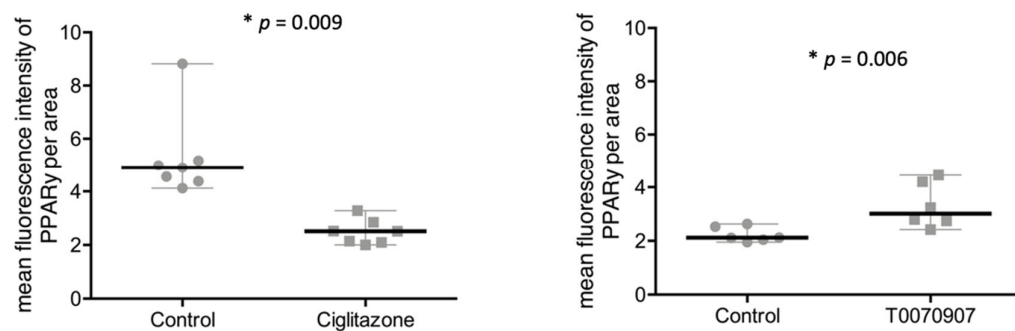

**Figure S9** Mean fluorescence intensity of PPAR $\gamma$  in primary isolated EVT cells after incubation with Ciglitazone (A) (20 mM) and T0070907 (B, D) (50 mM) mean fluorescence intensity  $\pm$  SD; The respective  $p$ -value indicates, if the intensity of untreated control cells and cells incubated with Ciglitazone or T0070907 differ significantly and was calculated using the Mann-Whitney-U-Test.



**Table S1.** Gestational age and sex of the babies of healthy and PE affected pregnancies. Missing information are presented as “-”.

| Controls          |                 |                        |         | PE                |                 |                        |          |                     |                       |
|-------------------|-----------------|------------------------|---------|-------------------|-----------------|------------------------|----------|---------------------|-----------------------|
| Week of Gestation | Sex of the Baby | Weight of the Baby (g) | APGAR   | Week of Gestation | Sex of the Baby | Weight of the Baby (g) | APGAR    | Proteinuria (mg/dL) | Blood Pressure (mmHg) |
| 40 + 3            | male            | -                      | -       | 40 + 0            | male            | 3110                   | 10/10/10 | 33.7                | 190/111               |
| 40 + 2            | female          | -                      | -       | 39 + 2            | male            | 3750                   | 4/7/9    | 82                  | 143/88                |
| 40 + 2            | female          | -                      | -       | 39 + 2            | male            | 3560                   | 9/10/10  | 300                 | 156/93                |
| 40 + 1            | female          | -                      | -       | 39 + 0            | male            | 3260                   | 10/10/10 | 300                 | 170/100               |
| 40 + 0            | female          | 3260                   | 9/10/10 | 38 + 0            | male            | 3030                   | 10/10/10 | -                   | -                     |
| 39 + 6            | male            | -                      | -       | 38 + 0            | female          | 2955                   | 9/10/10  | 300                 | 160/113               |
| 39 + 6            | female          | -                      | -       | 37 + 6            | male            | 2530                   | 8/10/10  | -                   | 157/84                |
| 39 + 1            | male            | 3675                   | 9/10/10 | 37 + 5            | female          | 2830                   | 8/10/10  | 72                  | 165/95                |
| 39 + 1            | male            | -                      | -       | 37 + 3            | male            | 2685                   | 8/10/10  | 33.8                | 155/115               |
| 39 + 1            | male            | -                      | -       | 37 + 2            | female          | 2750                   | 9/10/10  | -                   | -                     |
| 38 + 4            | male            | 2790                   | 9/10/10 | 36 + 1            | female          | 2650                   | 3/9/10   | 587                 | 152/77                |
| 38 + 4            | female          | -                      | -       | 36 + 1            | female          | 2220                   | 5/8/10   | 587                 | 152/78                |
| 38 + 4            | male            | 2650                   | 7/8/9   | 35 + 3            | female          | 2500                   | 9/10/10  | 191                 | 166/88                |
| 38 + 3            | female          | 2875                   | 9/10/10 | 35 + 0            | female          | 2330                   | 8/10/10  | 221                 | 170/83                |
| 38 + 3            | female          | -                      | -       | 35 + 0            | female          | 1555                   | 8/10/10  | -                   | 180/100               |
| 38 + 2            | female          | 3675                   | 9/10/10 | 34 + 6            | -               | -                      | -        | -                   | -                     |
| 38 + 1            | female          | 3310                   | 9/10/10 | 34 + 1            | male            | 1704                   | 9/10/10  | -                   | -                     |
| 38 + 0            | male            | -                      | -       | 34 + 1            | female          | 1735                   | 8/10/10  | 417                 | 180/120               |
| 37 + 0            | female          | 2580                   | 9/10/10 | 34 + 1            | male            | 2000                   | 7/9/10   | 300                 | 190/100               |
| 37 + 0            | male            | 2430                   | 9/10/10 | 33 + 5            | female          | 1770                   | 7/9/9    | 35.2                | 149/101               |
| 36 + 5            | male            | 3130                   | 8/9/10  | 29 + 5            | -               | -                      | -        | -                   | -                     |
| 36 + 0            | female          | 2550                   | 9/10/10 | 28 + 6            | female          | 930                    | 8/9/10   | 140                 | 155/97                |
| 36 + 0            | female          | 2260                   | 9/10/10 | 27 + 1            | male            | 680                    | 8/8/8    | 39.8                | 170/110               |
| 35 + 6            | female          | 2640                   | 9/10/10 | 25 + 6            | male            | 570                    | 4/7/9    | -                   | -                     |
| 35 + 1            | female          | -                      | -       | -                 | -               | -                      | -        | -                   | -                     |
|                   |                 |                        |         | -                 | -               | -                      | -        | -                   | -                     |

**Table S2.** Exemplary images of staining intensities scored by performing the IRS.

|               | No staining = 0                                                                     | Weak staining = 1                                                                   | Moderate staining = 2                                                                | Strong staining = 3                                                                   |
|---------------|-------------------------------------------------------------------------------------|-------------------------------------------------------------------------------------|--------------------------------------------------------------------------------------|---------------------------------------------------------------------------------------|
| PPAR $\gamma$ |  |  |  |  |
| RxR $\alpha$  |  |  |  |  |
